# Supplementary material
Source: publisher figshare collection journal article supplement (https://diabetesjournals.figshare.com/ndownloader/files/34880538)
Supplement: Supplementary file 1 [file 34880538]

## **Supplemental Methods**

### **Data sources**

The following nationwide, mandated-by-law registry data were collected and combined from all study patients:

- All hospital admissions, all outpatient visits in specialist medical care, and all emergency room admissions (International Classification of Diagnosis / ICD-10) and operational codes (Nordic Classification of Surgical Procedures) collected from the CRHC registry. Received from the National Institute for Health and Welfare of Finland. Available from Jan 1st 2004.
- Cancer data from the Finnish Cancer Registry. Received from the National Institute for Health and Welfare of Finland. Available from Jan 1<sup>st</sup> 1980.
- Prescription medication purchases including Anatomical Therapeutic Chemical (ATC)-codes and purchase dates. Received from the National Institute for Health and Welfare of Finland (Findata). Available from Jan 1<sup>st</sup> 2004.
- Entitlements to special reimbursements for prescription medications including entitlement codes and underlying ICD diagnoses. Received from the National Institute for Health and Welfare of Finland (Findata). Available from Jan 1<sup>st</sup> 1964.
- Mortality data including date and causes of death. Received from the Statistics Finland. Available from Jan 1<sup>st</sup> 2005.

Co-morbidities and complications of diabetes were detected from the data of index MI admission and data available prior to index MI. Revascularization was detected from the data of index MI admission.

### **Propensity matching**

Propensity score was re-calculated for hospital surviving patients. Patients with type 1 diabetes in the original matched cohort were 1:1 matched with hospital surviving controls without any type of diabetes using the nearest neighbor (NN) method that retained all hospital surviving patients with type 1 diabetes.

As a sensitivity analysis, all patients with type 1 diabetes were 1:1 matched with controls without diabetes using the original propensity score and nearest neighbor (NN) method that retained all patients with type 1 diabetes.

**Supplemental Results**

Propensity score matching of hospital surviving MI patients resulted in 1,552 pairs of patients with type 1 diabetes and without diabetes but with comparable baseline features (Supplement Table 1). In matched hospital surviving patients, the one-year case fatality was 12.8% in the type 1 diabetes group versus 8.8% in the control group (HR 1.49; CI 1.19-1.87;  $p=0.001$ ).

The NN matching of all patients with type 1 diabetes resulted in 1,935 pairs of patients with type 1 diabetes and without diabetes (Supplement Table 2). The duration of hospital stay after MI was longer in patients with type 1 diabetes (median: 7 days; IQR: 4–14 days) than in the NN-matched controls (median: 5 days; IQR: 3–10;  $p<0.0001$ ). Thirty-day case fatality was 12.7% in the type 1 diabetes group and 8.4% in the NN-matched control group ( $p<0.0001$ ). The one-year case fatality in the NN-matched cohort was 25.1% in the type 1 diabetes group versus 17.0% in the matched control group (HR 1.54; CI 1.32-1.78;  $p<0.0001$ ). The E-value for one-year case fatality in the NN-matched cohort was 2.5 (CI 2.0–3.0).

| Variable                            | Matched hospital surviving patients |                           |         |         |
|-------------------------------------|-------------------------------------|---------------------------|---------|---------|
|                                     | Type 1<br>diabetes<br>n=1,552       | No<br>diabetes<br>n=1,552 | P-value | SMD     |
| Age, years (SD)                     | 62.4 (12.4)                         | 62.4 (13.8)               | 0.980   | 0.001   |
| Women                               | 40.2%                               | 39.8%                     | 0.763   | 0.009   |
| Co-morbidities                      |                                     |                           |         |         |
| Alcohol abuse                       | 4.6%                                | 5.4%                      | 0.344   | 0.033   |
| Atrial fibrillation                 | 11.7%                               | 11.9%                     | 0.863   | 0.006   |
| Cerebrovascular disease             | 17.0%                               | 17.7%                     | 0.574   | 0.019   |
| Chronic pulmonary disease           | 12.1%                               | 11.5%                     | 0.593   | 0.018   |
| Dementia                            | 3.5%                                | 4.0%                      | 0.441   | 0.027   |
| Heart failure                       | 31.8%                               | 32.0%                     | 0.893   | 0.004   |
| Diabetic retinopathy or<br>glaucoma | 40.0%                               | -                         | -       |         |
| Diabetic hypoglycemic coma          | 11.2%                               | -                         |         |         |
| Diabetic neuropathy                 | 10.6%                               | -                         | -       |         |
| Diabetic ketoacidosis               | 7.6%                                | -                         | -       |         |
| Hypertension                        | 71.1%                               | 70.4%                     | 0.529   | 0.016   |
| Liver disease                       | 2.4%                                | 2.4%                      | 1.000   | <0.0001 |
| Malignancy                          | 11.1%                               | 11.5%                     | 0.706   | 0.012   |
| Paralysis                           | 1.0%                                | 1.0%                      | 0.853   | 0.007   |
| Peripheral vascular disease         | 24.5%                               | 24.4%                     | 0.923   | 0.003   |
| Prior CABG                          | 7.1%                                | 7.7%                      | 0.519   | 0.022   |
| Prior MI                            | 20.2%                               | 19.9%                     | 0.805   | 0.008   |
| Psychotic disorder                  | 3.4%                                | 3.7%                      | 0.626   | 0.018   |
| Rheumatic disease                   | 6.8%                                | 7.5%                      | 0.419   | 0.027   |
| Renal failure                       | 19.7%                               | 18.4%                     | 0.215   | 0.033   |
| Valvular disease                    | 5.7%                                | 5.7%                      | 1.000   | <0.0001 |
| Revascularization                   | 58.6%                               | 59.5%                     | 0.568   | 0.017   |
| PCI                                 | 49.5%                               | 50.5%                     | 0.511   | 0.019   |
| CABG                                | 11.3%                               | 11.2%                     | 0.948   | 0.002   |
| ST-elevation MI                     | 30.4%                               | 31.7%                     | 0.409   | 0.024   |
| Anterior MI*                        | 53.3%                               | 51.0%                     | 0.342   | 0.028   |
| University hospital                 | 55.0%                               | 56.1%                     | 0.467   | 0.022   |
| Year of MI                          |                                     |                           | 0.417   | 0.020   |

**Supplemental Table 1.** Baseline features of hospital surviving myocardial infarction patients with type 1 diabetes (included in the original matched cohort) and 1:1 matched control patients without diabetes. CABG = coronary artery bypass grafting surgery, MI = myocardial infarction, PCI = percutaneous coronary intervention, SMD = standardized mean difference. \*of ST elevation MI patients.

| Variable                            | Matched patients (nearest neighbor) |                           |         |       |
|-------------------------------------|-------------------------------------|---------------------------|---------|-------|
|                                     | Type 1<br>diabetes<br>n=1,935       | No<br>diabetes<br>n=1,935 | P-value | SMD   |
| Age, years (SD)                     | 62.5 (12.6)                         | 63.3 (14.1)               | 0.013   | 0.062 |
| Women                               | 40.6%                               | 40.3%                     | 0.816   | 0.006 |
| Co-morbidities                      |                                     |                           |         |       |
| Alcohol abuse                       | 5.0%                                | 5.0%                      | 0.424   | 0.026 |
| Atrial fibrillation                 | 12.1%                               | 12.5%                     | 0.702   | 0.011 |
| Cerebrovascular disease             | 19.5%                               | 19.1%                     | 0.726   | 0.011 |
| Chronic pulmonary disease           | 12.4%                               | 12.3%                     | 0.915   | 0.003 |
| Dementia                            | 4.1%                                | 4.3%                      | 0.747   | 0.010 |
| Heart failure                       | 37.3%                               | 37.1%                     | 0.902   | 0.003 |
| Diabetic retinopathy or<br>glaucoma | 40.9%                               | -                         | -       | -     |
| Diabetic hypoglycemic coma          | 11.8%                               | -                         |         |       |
| Diabetic neuropathy                 | 10.8%                               | -                         | -       | -     |
| Diabetic ketoacidosis               | 8.4%                                | -                         | -       | -     |
| Hypertension                        | 73.8%                               | 71.7%                     | 0.032   | 0.048 |
| Liver disease                       | 3.3%                                | 3.1%                      | 0.710   | 0.012 |
| Malignancy                          | 11.5%                               | 13.0%                     | 0.116   | 0.046 |
| Paralysis                           | 1.0%                                | 0.8%                      | 0.612   | 0.016 |
| Peripheral vascular disease         | 29.9%                               | 27.2%                     | 0.029   | 0.060 |
| Prior CABG                          | 7.8%                                | 7.6%                      | 0.800   | 0.008 |
| Prior MI                            | 22.2%                               | 21.6%                     | 0.615   | 0.015 |
| Psychotic disorder                  | 3.4%                                | 3.5%                      | 0.861   | 0.006 |
| Rheumatic disease                   | 7.1%                                | 8.9%                      | 0.031   | 0.069 |
| Renal failure                       | 27.0%                               | 23.6%                     | 0.001   | 0.080 |
| Valvular disease                    | 5.9%                                | 5.5%                      | 0.566   | 0.018 |
| Revascularization                   | 54.0%                               | 55.3%                     | 0.320   | 0.026 |
| PCI                                 | 43.9%                               | 44.5%                     | 0.655   | 0.011 |
| CABG                                | 11.1%                               | 11.6%                     | 0.481   | 0.020 |
| ST-elevation MI                     | 30.4%                               | 31.7%                     | 0.262   | 0.029 |
| Anterior MI*                        | 52.7%                               | 49.5%                     | 0.298   | 0.032 |
| University hospital                 | 53.9%                               | 55.5%                     | 0.240   | 0.031 |
| Year of MI                          |                                     |                           | 0.705   | 0.006 |

**Supplemental Table 2.** Baseline features of myocardial infarction patients with type 1 diabetes in the original cohort and 1:1 nearest neighbor method matched control patients without diabetes. CABG = coronary artery bypass grafting surgery, MI = myocardial infarction, PCI = percutaneous coronary intervention, SMD = standardized mean difference. \*of ST elevation MI patients.

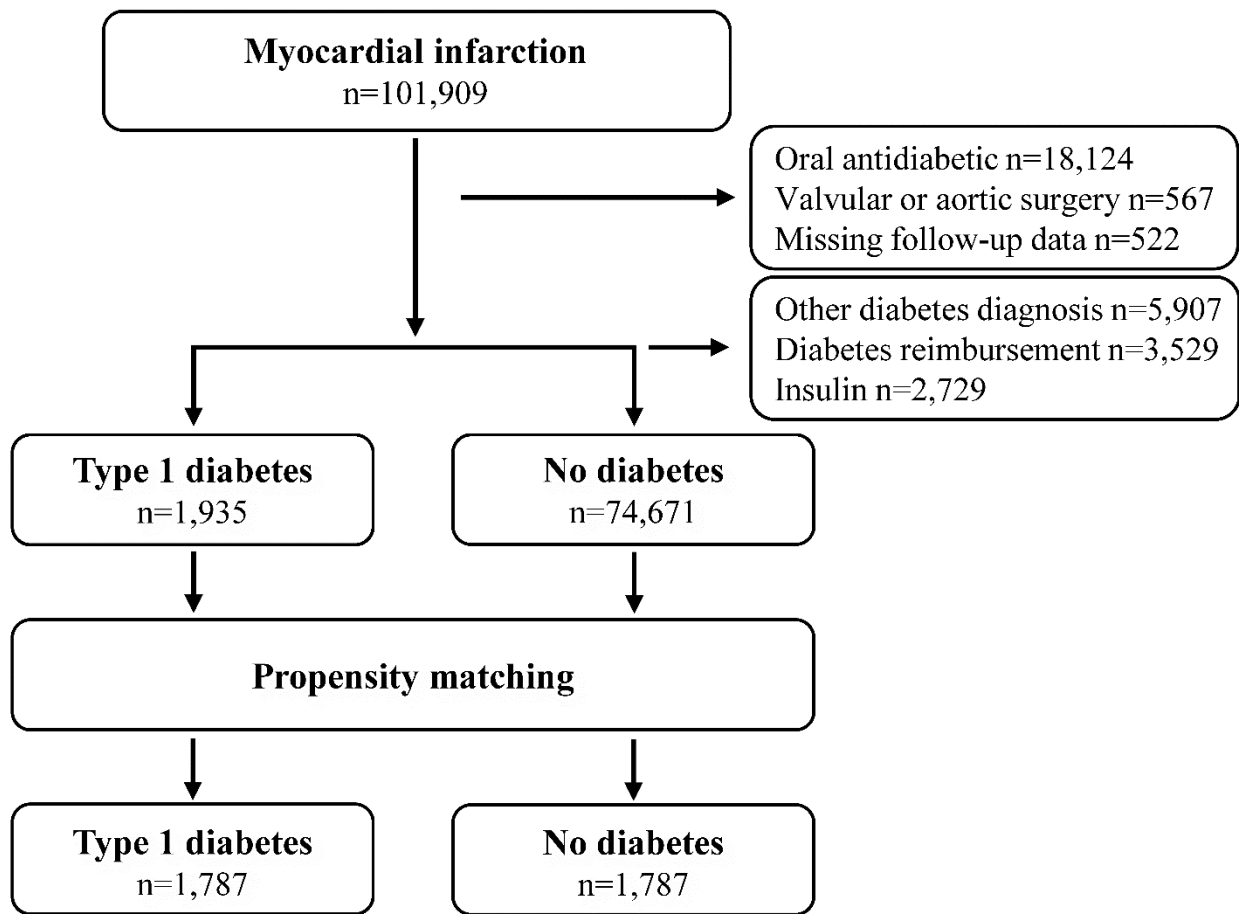

**Supplemental Figure 1.** Study flow-chart.
